# Supplementary material for: Feasibility and effectiveness of a novel dynamic arm support in persons with spinal muscular atrophy and duchenne muscular dystrophy
Source: PubMed Central journal article supplement (PMC8139063; doi:10.1186/s12984-021-00868-6), 2021-05-21
Supplement: 12984_2021_868_MOESM1_ESM.pdf [file 12984_2021_868_MOESM1_ESM.pdf]

## Appendix A. Reachable workspace – full result

Table A1: Relative surface area

|                                | Right arm       |              |                                     | Left arm        |              |                                     |
|--------------------------------|-----------------|--------------|-------------------------------------|-----------------|--------------|-------------------------------------|
|                                | Without support | With support | Difference with-<br>without support | Without support | With support | Difference with-<br>without support |
| RSA Quadrant 1 – Upper medial  |                 |              |                                     |                 |              |                                     |
| Subject 1                      | 0.00            | 0.01         | 0.01                                | 0.00            | 0.00         | 0.00                                |
| Subject 2                      | 0.00            | 0.00         | 0.00                                | 0.00            | 0.03         | 0.03                                |
| Subject 3                      | 0.00            | 0.00         | 0.00                                | 0.00            | 0.00         | 0.00                                |
| Subject 4                      | 0.00            | 0.00         | 0.00                                | 0.00            | 0.02         | 0.02                                |
| Subject 5                      | 0.00            | 0.00         | 0.00                                | 0.00            | 0.00         | 0.00                                |
| Subject 6                      | 0.00            | 0.01         | 0.01                                | 0.00            | 0.00         | 0.00                                |
| RSA Quadrant 2 – Lower medial  |                 |              |                                     |                 |              |                                     |
| Subject 1                      | 0.01            | 0.04         | 0.03                                | 0.02            | 0.05         | 0.03                                |
| Subject 2                      | 0.05            | 0.04         | -0.01                               | 0.07            | 0.07         | 0.00                                |
| Subject 3                      | 0.00            | 0.04         | 0.04                                | 0.01            | 0.03         | 0.03                                |
| Subject 4                      | 0.06            | 0.09         | 0.03                                | 0.05            | 0.11         | 0.06                                |
| Subject 5                      | 0.01            | 0.00         | 0.00                                | 0.00            | 0.00         | 0.00                                |
| Subject 6                      | 0.04            | 0.05         | 0.01                                | 0.06            | 0.08         | 0.02                                |
| RSA Quadrant 3 – Upper lateral |                 |              |                                     |                 |              |                                     |
| Subject 1                      | 0.00            | 0.02         | 0.02                                | 0.00            | 0.01         | 0.01                                |
| Subject 2                      | 0.01            | 0.01         | 0.00                                | 0.00            | 0.00         | 0.00                                |
| Subject 3                      | 0.00            | 0.00         | 0.00                                | 0.00            | 0.00         | 0.00                                |
| Subject 4                      | 0.00            | 0.00         | 0.00                                | 0.00            | 0.00         | 0.00                                |
| Subject 5                      | 0.00            | 0.00         | 0.00                                | 0.00            | 0.02         | 0.02                                |
| Subject 6                      | 0.00            | 0.02         | 0.02                                | 0.00            | 0.01         | 0.01                                |
| RSA Quadrant 4 – Lower lateral |                 |              |                                     |                 |              |                                     |
| Subject 1                      | 0.03            | 0.07         | 0.05                                | 0.02            | 0.06         | 0.04                                |
| Subject 2                      | 0.14            | 0.11         | -0.03                               | 0.09            | 0.07         | -0.02                               |
| Subject 3                      | 0.06            | 0.11         | 0.05                                | 0.07            | 0.09         | 0.02                                |
| Subject 4                      | 0.13            | 0.11         | -0.02                               | 0.05            | 0.10         | 0.04                                |
| Subject 5                      | 0.07            | 0.05         | -0.02                               | 0.04            | 0.03         | -0.01                               |
| Subject 6                      | 0.12            | 0.12         | -0.01                               | 0.08            | 0.12         | 0.04                                |
| RSA - total                    |                 |              |                                     |                 |              |                                     |
| Subject 1                      | 0.03            | 0.14         | 0.11                                | 0.04            | 0.12         | 0.08                                |
| Subject 2                      | 0.20            | 0.16         | -0.04                               | 0.17            | 0.17         | 0.00                                |
| Subject 3                      | 0.06            | 0.15         | 0.09                                | 0.07            | 0.12         | 0.05                                |
| Subject 4                      | 0.19            | 0.20         | 0.01                                | 0.10            | 0.23         | 0.13                                |
| Subject 5                      | 0.08            | 0.05         | -0.02                               | 0.04            | 0.05         | 0.01                                |
| Subject 6                      | 0.16            | 0.19         | 0.03                                | 0.14            | 0.21         | 0.07                                |

Table A2: Absolute surface area (m<sup>2</sup>)

|                                | Right arm       |              |                                     | Left arm        |              |                                     |
|--------------------------------|-----------------|--------------|-------------------------------------|-----------------|--------------|-------------------------------------|
|                                | Without support | With support | Difference with-<br>without support | Without support | With support | Difference with-<br>without support |
| RSA Quadrant 1 – Upper medial  |                 |              |                                     |                 |              |                                     |
| Subject 1                      | 0.00            | 0.02         | 0.02                                | 0.00            | 0.00         | 0.00                                |
| Subject 2                      | 0.00            | 0.00         | 0.00                                | 0.00            | 0.03         | 0.03                                |
| Subject 3                      | 0.00            | 0.00         | 0.00                                | 0.00            | 0.00         | 0.00                                |
| Subject 4                      | 0.00            | 0.01         | 0.01                                | 0.00            | 0.03         | 0.03                                |
| Subject 5                      | 0.00            | 0.00         | 0.00                                | 0.00            | 0.00         | 0.00                                |
| Subject 6                      | 0.00            | 0.01         | 0.01                                | 0.00            | 0.00         | 0.00                                |
| RSA Quadrant 2 – Lower medial  |                 |              |                                     |                 |              |                                     |
| Subject 1                      | 0.01            | 0.06         | 0.05                                | 0.03            | 0.06         | 0.04                                |
| Subject 2                      | 0.08            | 0.06         | -0.01                               | 0.11            | 0.09         | -0.03                               |
| Subject 3                      | 0.01            | 0.08         | 0.07                                | 0.01            | 0.04         | 0.03                                |
| Subject 4                      | 0.12            | 0.15         | 0.03                                | 0.09            | 0.15         | 0.06                                |
| Subject 5                      | 0.01            | 0.00         | 0.00                                | 0.00            | 0.00         | 0.00                                |
| Subject 6                      | 0.08            | 0.09         | 0.01                                | 0.12            | 0.14         | 0.02                                |
| RSA Quadrant 3 – Upper lateral |                 |              |                                     |                 |              |                                     |
| Subject 1                      | 0.00            | 0.03         | 0.03                                | 0.00            | 0.01         | 0.01                                |
| Subject 2                      | 0.02            | 0.02         | 0.00                                | 0.00            | 0.00         | 0.00                                |
| Subject 3                      | 0.00            | 0.00         | 0.00                                | 0.00            | 0.00         | 0.00                                |
| Subject 4                      | 0.00            | 0.00         | 0.00                                | 0.00            | 0.00         | 0.00                                |
| Subject 5                      | 0.00            | 0.00         | 0.00                                | 0.00            | 0.01         | 0.01                                |
| Subject 6                      | 0.00            | 0.04         | 0.04                                | 0.00            | 0.02         | 0.02                                |
| RSA Quadrant 4 – Lower lateral |                 |              |                                     |                 |              |                                     |
| Subject 1                      | 0.04            | 0.11         | 0.08                                | 0.03            | 0.09         | 0.06                                |
| Subject 2                      | 0.22            | 0.16         | -0.06                               | 0.14            | 0.08         | -0.06                               |
| Subject 3                      | 0.10            | 0.19         | 0.08                                | 0.11            | 0.11         | 0.00                                |
| Subject 4                      | 0.24            | 0.18         | -0.06                               | 0.09            | 0.13         | 0.04                                |
| Subject 5                      | 0.08            | 0.07         | -0.02                               | 0.04            | 0.03         | -0.02                               |
| Subject 6                      | 0.28            | 0.21         | -0.07                               | 0.17            | 0.21         | 0.04                                |
| RSA - total                    |                 |              |                                     |                 |              |                                     |
| Subject 1                      | 0.05            | 0.22         | 0.17                                | 0.06            | 0.17         | 0.11                                |
| Subject 2                      | 0.33            | 0.25         | -0.07                               | 0.26            | 0.20         | -0.05                               |
| Subject 3                      | 0.11            | 0.26         | 0.15                                | 0.12            | 0.15         | 0.03                                |
| Subject 4                      | 0.36            | 0.34         | -0.02                               | 0.18            | 0.31         | 0.13                                |
| Subject 5                      | 0.09            | 0.07         | -0.02                               | 0.04            | 0.04         | 0.00                                |
| Subject 6                      | 0.37            | 0.36         | 0.00                                | 0.28            | 0.37         | 0.08                                |
