# Supplementary material for: Feasibility and effectiveness of a novel dynamic arm support in persons with spinal muscular atrophy and duchenne muscular dystrophy
Source: PubMed Central journal article supplement (PMC8139063; doi:10.1186/s12984-021-00868-6), 2021-05-21
Supplement: 12984_2021_868_MOESM2_ESM.pdf [file 12984_2021_868_MOESM2_ESM.pdf]

## Appendix B. Functional workspace – score per item

Table B: Functional workspace per item

|                                 | Right arm       |              |                                     | Left arm        |              |                                     |
|---------------------------------|-----------------|--------------|-------------------------------------|-----------------|--------------|-------------------------------------|
|                                 | Without support | With support | Difference with-<br>without support | Without support | With support | Difference with-<br>without support |
| Target – belly button           |                 |              |                                     |                 |              |                                     |
| Subject 1                       | 3               | 3            | 0                                   | 3               | 3            | 0                                   |
| Subject 2                       | 3               | 3            | 0                                   | 3               | 3            | 0                                   |
| Subject 3                       | 3               | 3            | 0                                   | 3               | 3            | 0                                   |
| Subject 4                       | 3               | 3            | 0                                   | 3               | 3            | 0                                   |
| Subject 5                       | 3               | 3            | 0                                   | 3               | 3            | 0                                   |
| Subject 6                       | 3               | 3            | 0                                   | 3               | 3            | 0                                   |
| Target – back pocket            |                 |              |                                     |                 |              |                                     |
| Subject 1                       | 1               | 0            | -1                                  | 1               | 1            | 0                                   |
| Subject 2                       | 2               | 2            | 0                                   | 2               | 1            | -1                                  |
| Subject 3                       | 1               | 1            | 0                                   | 1               | 0            | -1                                  |
| Subject 4                       | 2               | 1            | -1                                  | .               | 1            | .                                   |
| Subject 5                       | .               | .            | .                                   | .               | .            | .                                   |
| Subject 6                       | .               | .            | .                                   | .               | .            | .                                   |
| Target – ipsilateral shoulder   |                 |              |                                     |                 |              |                                     |
| Subject 1                       | 1               | 2            | 1                                   | 2               | 2            | 0                                   |
| Subject 2                       | 1               | 2            | 1                                   | 1               | 2            | 1                                   |
| Subject 3                       | 3               | 3            | 0                                   | 3               | 3            | 0                                   |
| Subject 4                       | 1               | 1            | 0                                   | 1               | 2            | 1                                   |
| Subject 5                       | 2               | 2            | 0                                   | 2               | 2            | 0                                   |
| Subject 6                       | 2               | 2            | 0                                   | 2               | 2            | 0                                   |
| Target – contralateral shoulder |                 |              |                                     |                 |              |                                     |
| Subject 1                       | 2               | 2            | 0                                   | 2               | 2            | 0                                   |
| Subject 2                       | 2               | 2            | 0                                   | 2               | 3            | 1                                   |
| Subject 3                       | 2               | 2            | 0                                   | 2               | 2            | 0                                   |
| Subject 4                       | 3               | 2            | -1                                  | 2               | 2            | 0                                   |
| Subject 5                       | 2               | 2            | 0                                   | 2               | 2            | 0                                   |
| Subject 6                       | 2               | 2            | 0                                   | 2               | 2            | 0                                   |
| Target – mouth                  |                 |              |                                     |                 |              |                                     |
| Subject 1                       | 2               | 2            | 0                                   | 2               | 2            | 0                                   |
| Subject 2                       | 2               | 2            | 0                                   | 2               | 2            | 0                                   |
| Subject 3                       | 2               | 3            | 1                                   | 2               | 3            | 1                                   |
| Subject 4                       | 2               | 2            | 0                                   | 1               | 2            | 1                                   |
| Subject 5                       | 3               | 2            | -1                                  | 3               | 2            | -1                                  |
| Subject 6                       | 3               | 2            | -1                                  | 3               | 2            | -1                                  |
| Target – top of head            |                 |              |                                     |                 |              |                                     |
| Subject 1                       | 2               | 2            | 0                                   | 1               | 2            | 1                                   |
| Subject 2                       | 2               | 2            | 0                                   | 2               | 2            | 0                                   |
| Subject 3                       | 1               | 2            | 1                                   | 1               | 2            | 1                                   |
| Subject 4                       | 2               | 2            | 0                                   | 0               | 2            | 2                                   |
| Subject 5                       | 1               | 2            | 1                                   | 1               | 2            | 1                                   |
| Subject 6                       | 1               | 2            | 1                                   | 1               | 2            | 1                                   |
| Target – back of head           |                 |              |                                     |                 |              |                                     |
| Subject 1                       | 2               | 2            | 0                                   | 2               | 2            | 0                                   |
| Subject 2                       | 1               | 2            | 1                                   | 1               | 1            | 0                                   |
| Subject 3                       | 1               | 1            | 0                                   | 1               | 1            | 0                                   |
| Subject 4                       | 1               | 1            | 0                                   | 0               | 1            | 1                                   |
| Subject 5                       | 1               | 1            | 0                                   | 1               | 1            | 0                                   |
| Subject 6                       | 1               | 1            | 0                                   | 1               | 1            | 0                                   |

. = missing variable
