# Supplementary material for: Feasibility and effectiveness of a novel dynamic arm support in persons with spinal muscular atrophy and duchenne muscular dystrophy
Source: PubMed Central journal article supplement (PMC8139063; doi:10.1186/s12984-021-00868-6), 2021-05-21
Supplement: 12984_2021_868_MOESM3_ESM.pdf [file 12984_2021_868_MOESM3_ESM.pdf]

## Appendix C: Functional ability

**Table C1: Performance of upper limb scores per item**

| Item                                             | Item nr. | Side      | Dimension | Subject   | Without support | With support | Difference with-without support |
|--------------------------------------------------|----------|-----------|-----------|-----------|-----------------|--------------|---------------------------------|
| Entry item                                       |          |           |           |           | 3               | 3            | 0                               |
| Shoulder abduction arms above head               | 1        | Both arms | Shoulder  | Subject 1 | 0               | 0            | 0                               |
| Raise both arms to shoulder height               | 2        | Both arms | Shoulder  | Subject 1 | 0               | 0            | 0                               |
| Shoulder flexion to shoulder height (no weights) | 3        | Right     | Shoulder  | Subject 1 | 0               | 1            | 1                               |
| Shoulder flexion to shoulder height (no weights) | 3        | Left      | Shoulder  | Subject 1 | 0               | 1            | 1                               |
| Shoulder flexion to shoulder height with 500g    | 4        | Right     | Shoulder  | Subject 1 | 0               | 0            | 0                               |
| Shoulder flexion to shoulder height with 500g    | 4        | Left      | Shoulder  | Subject 1 | 0               | 0            | 0                               |
| Shoulder flexion above shoulder with 500g weight | 5        | Right     | Shoulder  | Subject 1 | 0               | 0            | 0                               |
| Shoulder flexion above shoulder with 500g weight | 5        | Left      | Shoulder  | Subject 1 | 0               | 0            | 0                               |
| Shoulder flexion above shoulder with 1 kg weight | 6        | Right     | Shoulder  | Subject 1 | 0               | 0            | 0                               |
| Shoulder flexion above shoulder with 1 kg weight | 6        | Left      | Shoulder  | Subject 1 | 0               | 0            | 0                               |
| Hand(s) to mouth                                 | 7        | Right     | Elbow     | Subject 1 | 1               | 1            | 0                               |
| Hand(s) to mouth                                 | 7        | Left      | Elbow     | Subject 1 | 1               | 1            | 0                               |
| Hands to table from lap                          | 8        | Both arms | Elbow     | Subject 1 | 1               | 2            | 1                               |
| Move weight on table 100g                        | 9        | Right     | Elbow     | Subject 1 | 1               | 2            | 1                               |
| Move weight on table 100g                        | 9        | Left      | Elbow     | Subject 1 | 1               | 2            | 1                               |
| Move weight on table 500g                        | 10       | Right     | Elbow     | Subject 1 | 1               | 2            | 1                               |
| Move weight on table 500g                        | 10       | Left      | Elbow     | Subject 1 | 0               | 2            | 2                               |
| Move weight on table 1kg                         | 11       | Right     | Elbow     | Subject 1 | 0               | 1            | 1                               |
| Move weight on table 1kg                         | 11       | Left      | Elbow     | Subject 1 | 0               | 1            | 1                               |
| Lift heavy can diagonally                        | 12       | Right     | Elbow     | Subject 1 | 0               | 0            | 0                               |
| Lift heavy can diagonally                        | 12       | Left      | Elbow     | Subject 1 | 0               | 0            | 0                               |
| Stack of three cans (heavy cans)                 | 13       | Right     | Elbow     | Subject 1 | 0               | 0            | 0                               |
| Stack of three cans (heavy cans)                 | 13       | Left      | Elbow     | Subject 1 | 0               | 0            | 0                               |
| Stack of five cans (heavy cans)                  | 14       | Right     | Elbow     | Subject 1 | 0               | 0            | 0                               |
| Stack of five cans (heavy cans)                  | 14       | Left      | Elbow     | Subject 1 | 0               | 0            | 0                               |
| Remove lid from container                        | 15       | Both arms | Elbow     | Subject 1 | 1               | 1            | 0                               |
| Tearing paper                                    | 16       | Both arms | Elbow     | Subject 1 | 2               | 2            | 0                               |
| Entry item                                       |          |           |           | Subject 2 | 3               | 4            | 1                               |
| Shoulder abduction arms above head               | 1        | Both arms | Shoulder  | Subject 2 | 0               | 0            | 0                               |
| Raise both arms to shoulder height               | 2        | Both arms | Shoulder  | Subject 2 | 0               | 2            | 2                               |
| Shoulder flexion to shoulder height (no weights) | 3        | Right     | Shoulder  | Subject 2 | 1               | 1            | 0                               |
| Shoulder flexion to shoulder height (no weights) | 3        | Left      | Shoulder  | Subject 2 | 1               | 0            | -1                              |
| Shoulder flexion to shoulder height with 500g    | 4        | Right     | Shoulder  | Subject 2 | 0               | 0            | 0                               |
| Shoulder flexion to shoulder height with 500g    | 4        | Left      | Shoulder  | Subject 2 | 0               | 0            | 0                               |
| Shoulder flexion above shoulder with 500g weight | 5        | Right     | Shoulder  | Subject 2 | 0               | 0            | 0                               |
| Shoulder flexion above shoulder with 500g weight | 5        | Left      | Shoulder  | Subject 2 | 0               | 0            | 0                               |
| Shoulder flexion above shoulder with 1 kg weight | 6        | Right     | Shoulder  | Subject 2 | 0               | 0            | 0                               |
| Shoulder flexion above shoulder with 1 kg weight | 6        | Left      | Shoulder  | Subject 2 | 0               | 0            | 0                               |
| Hand(s) to mouth                                 | 7        | Right     | Elbow     | Subject 2 | 1               | 1            | 0                               |
| Hand(s) to mouth                                 | 7        | Left      | Elbow     | Subject 2 | 1               | 1            | 0                               |
| Hands to table from lap                          | 8        | Both arms | Elbow     | Subject 2 | 2               | 2            | 0                               |
| Move weight on table 100g                        | 9        | Right     | Elbow     | Subject 2 | 2               | 2            | 0                               |
| Move weight on table 100g                        | 9        | Left      | Elbow     | Subject 2 | 2               | 2            | 0                               |
| Move weight on table 500g                        | 10       | Right     | Elbow     | Subject 2 | 1               | 2            | 1                               |
| Move weight on table 500g                        | 10       | Left      | Elbow     | Subject 2 | 1               | 1            | 0                               |
| Move weight on table 1kg                         | 11       | Right     | Elbow     | Subject 2 | 1               | 1            | 0                               |
| Move weight on table 1kg                         | 11       | Left      | Elbow     | Subject 2 | 1               | 1            | 0                               |
| Lift heavy can diagonally                        | 12       | Right     | Elbow     | Subject 2 | 1               | 1            | 0                               |
| Lift heavy can diagonally                        | 12       | Left      | Elbow     | Subject 2 | 1               | 1            | 0                               |
| Stack of three cans (heavy cans)                 | 13       | Right     | Elbow     | Subject 2 | 0               | 1            | 1                               |
| Stack of three cans (heavy cans)                 | 13       | Left      | Elbow     | Subject 2 | 0               | 0            | 0                               |

(repeat)

| Item                                             | Item nr. | Side      | Dimension | Subject   | Without support | With support | Difference with-without support |
|--------------------------------------------------|----------|-----------|-----------|-----------|-----------------|--------------|---------------------------------|
| Stack of five cans (heavy cans)                  | 14       | Right     | Elbow     | Subject 2 | 0               | 0            | 0                               |
| Stack of five cans (heavy cans)                  | 14       | Left      | Elbow     | Subject 2 | 0               | 0            | 0                               |
| Remove lid from container                        | 15       | Both arms | Elbow     | Subject 2 | 1               | 1            | 0                               |
| Tearing paper                                    | 16       | Both arms | Elbow     | Subject 2 | 2               | 2            | 0                               |
| Entry item                                       |          |           |           | Subject 3 | 3               | 3            | 0                               |
| Shoulder abduction arms above head               | 1        | Both arms | Shoulder  | Subject 3 | 0               | 0            | 0                               |
| Raise both arms to shoulder height               | 2        | Both arms | Shoulder  | Subject 3 | 0               | 0            | 0                               |
| Shoulder flexion to shoulder height (no weights) | 3        | Right     | Shoulder  | Subject 3 | 0               | 0            | 0                               |
| Shoulder flexion to shoulder height (no weights) | 3        | Left      | Shoulder  | Subject 3 | 0               | 0            | 0                               |
| Shoulder flexion to shoulder height with 500g    | 4        | Right     | Shoulder  | Subject 3 | 0               | 0            | 0                               |
| Shoulder flexion to shoulder height with 500g    | 4        | Left      | Shoulder  | Subject 3 | 0               | 0            | 0                               |
| Shoulder flexion above shoulder with 500g weight | 5        | Right     | Shoulder  | Subject 3 | 0               | 0            | 0                               |
| Shoulder flexion above shoulder with 500g weight | 5        | Left      | Shoulder  | Subject 3 | 0               | 0            | 0                               |
| Shoulder flexion above shoulder with 1 kg weight | 6        | Right     | Shoulder  | Subject 3 | 0               | 0            | 0                               |
| Shoulder flexion above shoulder with 1 kg weight | 6        | Left      | Shoulder  | Subject 3 | 0               | 0            | 0                               |
| Hand(s) to mouth                                 | 7        | Right     | Elbow     | Subject 3 | 2               | 2            | 0                               |
| Hand(s) to mouth                                 | 7        | Left      | Elbow     | Subject 3 | 1               | 1            | 0                               |
| Hands to table from lap                          | 8        | Both arms | Elbow     | Subject 3 | 2               | 2            | 0                               |
| Move weight on table 100g                        | 9        | Right     | Elbow     | Subject 3 | 2               | 2            | 0                               |
| Move weight on table 100g                        | 9        | Left      | Elbow     | Subject 3 | 2               | 2            | 0                               |
| Move weight on table 500g                        | 10       | Right     | Elbow     | Subject 3 | 2               | 2            | 0                               |
| Move weight on table 500g                        | 10       | Left      | Elbow     | Subject 3 | 1               | 1            | 0                               |
| Move weight on table 1kg                         | 11       | Right     | Elbow     | Subject 3 | 1               | 1            | 0                               |
| Move weight on table 1kg                         | 11       | Left      | Elbow     | Subject 3 | 0               | 1            | 1                               |
| Lift heavy can diagonally                        | 12       | Right     | Elbow     | Subject 3 | 0               | 0            | 0                               |
| Lift heavy can diagonally                        | 12       | Left      | Elbow     | Subject 3 | 0               | 0            | 0                               |
| Stack of three cans (heavy cans)                 | 13       | Right     | Elbow     | Subject 3 | 0               | 0            | 0                               |
| Stack of three cans (heavy cans)                 | 13       | Left      | Elbow     | Subject 3 | 0               | 0            | 0                               |
| Stack of five cans (heavy cans)                  | 14       | Right     | Elbow     | Subject 3 | 0               | 0            | 0                               |
| Stack of five cans (heavy cans)                  | 14       | Left      | Elbow     | Subject 3 | 0               | 0            | 0                               |
| Remove lid from container                        | 15       | Both arms | Elbow     | Subject 3 | 0               | 0            | 0                               |
| Tearing paper                                    | 16       | Both arms | Elbow     | Subject 3 | 2               | 2            | 0                               |
| Entry item                                       |          |           |           | Subject 4 | 3               | 3            | 0                               |
| Shoulder abduction arms above head               | 1        | Both arms | Shoulder  | Subject 4 | 0               | 0            | 0                               |
| Raise both arms to shoulder height               | 2        | Both arms | Shoulder  | Subject 4 | 0               | 1            | 1                               |
| Shoulder flexion to shoulder height (no weights) | 3        | Right     | Shoulder  | Subject 4 | 1               | 1            | 0                               |
| Shoulder flexion to shoulder height (no weights) | 3        | Left      | Shoulder  | Subject 4 | 0               | 1            | 1                               |
| Shoulder flexion to shoulder height with 500g    | 4        | Right     | Shoulder  | Subject 4 | 0               | 0            | 0                               |
| Shoulder flexion to shoulder height with 500g    | 4        | Left      | Shoulder  | Subject 4 | 0               | 0            | 0                               |
| Shoulder flexion above shoulder with 500g weight | 5        | Right     | Shoulder  | Subject 4 | 0               | 0            | 0                               |
| Shoulder flexion above shoulder with 500g weight | 5        | Left      | Shoulder  | Subject 4 | 0               | 0            | 0                               |
| Shoulder flexion above shoulder with 1 kg weight | 6        | Right     | Shoulder  | Subject 4 | 0               | 0            | 0                               |
| Shoulder flexion above shoulder with 1 kg weight | 6        | Left      | Shoulder  | Subject 4 | 0               | 0            | 0                               |
| Hand(s) to mouth                                 | 7        | Right     | Elbow     | Subject 4 | 0               | 2            | 2                               |
| Hand(s) to mouth                                 | 7        | Left      | Elbow     | Subject 4 | 0               | 2            | 2                               |
| Hands to table from lap                          | 8        | Both arms | Elbow     | Subject 4 | 2               | 2            | 0                               |
| Move weight on table 100g                        | 9        | Right     | Elbow     | Subject 4 | 2               | 2            | 0                               |
| Move weight on table 100g                        | 9        | Left      | Elbow     | Subject 4 | 2               | 2            | 0                               |
| Move weight on table 500g                        | 10       | Right     | Elbow     | Subject 4 | 1               | 2            | 1                               |
| Move weight on table 500g                        | 10       | Left      | Elbow     | Subject 4 | 1               | 1            | 0                               |
| Move weight on table 1kg                         | 11       | Right     | Elbow     | Subject 4 | 1               | 1            | 0                               |
| Move weight on table 1kg                         | 11       | Left      | Elbow     | Subject 4 | 0               | 1            | 1                               |
| Lift heavy can diagonally                        | 12       | Right     | Elbow     | Subject 4 | 1               | 2            | 1                               |
| Lift heavy can diagonally                        | 12       | Left      | Elbow     | Subject 4 | 1               | 2            | 1                               |
| Stack of three cans (heavy cans)                 | 13       | Right     | Elbow     | Subject 4 | 0               | 0            | 0                               |

(repeat)

| Item                                             | Item nr. | Side      | Dimension | Subject   | Without support | With support | Difference with-without support |
|--------------------------------------------------|----------|-----------|-----------|-----------|-----------------|--------------|---------------------------------|
| Stack of three cans (heavy cans)                 | 13       | Left      | Elbow     | Subject 4 | 0               | 0            | 0                               |
| Stack of five cans (heavy cans)                  | 14       | Right     | Elbow     | Subject 4 | 0               | 0            | 0                               |
| Stack of five cans (heavy cans)                  | 14       | Left      | Elbow     | Subject 4 | 0               | 0            | 0                               |
| Remove lid from container                        | 15       | Both arms | Elbow     | Subject 4 | 1               | 1            | 0                               |
| Tearing paper                                    | 16       | Both arms | Elbow     | Subject 4 | 2               | 2            | 0                               |
| Entry item                                       |          |           |           | Subject 5 | 3               | 3            | 0                               |
| Shoulder abduction arms above head               | 1        | Both arms | Shoulder  | Subject 5 | 0               | 0            | 0                               |
| Raise both arms to shoulder height               | 2        | Both arms | Shoulder  | Subject 5 | 0               | 0            | 0                               |
| Shoulder flexion to shoulder height (no weights) | 3        | Right     | Shoulder  | Subject 5 | 0               | 0            | 0                               |
| Shoulder flexion to shoulder height (no weights) | 3        | Left      | Shoulder  | Subject 5 | 0               | 0            | 0                               |
| Shoulder flexion to shoulder height with 500g    | 4        | Right     | Shoulder  | Subject 5 | 0               | 0            | 0                               |
| Shoulder flexion to shoulder height with 500g    | 4        | Left      | Shoulder  | Subject 5 | 0               | 0            | 0                               |
| Shoulder flexion above shoulder with 500g weight | 5        | Right     | Shoulder  | Subject 5 | 0               | 0            | 0                               |
| Shoulder flexion above shoulder with 500g weight | 5        | Left      | Shoulder  | Subject 5 | 0               | 0            | 0                               |
| Shoulder flexion above shoulder with 1 kg weight | 6        | Right     | Shoulder  | Subject 5 | 0               | 0            | 0                               |
| Shoulder flexion above shoulder with 1 kg weight | 6        | Left      | Shoulder  | Subject 5 | 0               | 0            | 0                               |
| Hand(s) to mouth                                 | 7        | Right     | Elbow     | Subject 5 | 1               | 1            | 0                               |
| Hand(s) to mouth                                 | 7        | Left      | Elbow     | Subject 5 | 1               | 1            | 0                               |
| Hands to table from lap                          | 8        | Both arms | Elbow     | Subject 5 | 0               | 0            | 0                               |
| Move weight on table 100g                        | 9        | Right     | Elbow     | Subject 5 | 0               | 2            | 2                               |
| Move weight on table 100g                        | 9        | Left      | Elbow     | Subject 5 | 1               | 2            | 1                               |
| Move weight on table 500g                        | 10       | Right     | Elbow     | Subject 5 | 0               | 0            | 0                               |
| Move weight on table 500g                        | 10       | Left      | Elbow     | Subject 5 | 1               | 0            | -1                              |
| Move weight on table 1kg                         | 11       | Right     | Elbow     | Subject 5 | 0               | 0            | 0                               |
| Move weight on table 1kg                         | 11       | Left      | Elbow     | Subject 5 | 0               | 0            | 0                               |
| Lift heavy can diagonally                        | 12       | Right     | Elbow     | Subject 5 | 0               | 0            | 0                               |
| Lift heavy can diagonally                        | 12       | Left      | Elbow     | Subject 5 | 0               | 0            | 0                               |
| Stack of three cans (heavy cans)                 | 13       | Right     | Elbow     | Subject 5 | 0               | 0            | 0                               |
| Stack of three cans (heavy cans)                 | 13       | Left      | Elbow     | Subject 5 | 0               | 0            | 0                               |
| Stack of five cans (heavy cans)                  | 14       | Right     | Elbow     | Subject 5 | 0               | 0            | 0                               |
| Stack of five cans (heavy cans)                  | 14       | Left      | Elbow     | Subject 5 | 0               | 0            | 0                               |
| Remove lid from container                        | 15       | Both arms | Elbow     | Subject 5 | 0               | 0            | 0                               |
| Tearing paper                                    | 16       | Both arms | Elbow     | Subject 5 | 0               | 0            | 0                               |
| Entry item                                       |          |           |           | Subject 6 | 3               | 3            | 0                               |
| Shoulder abduction arms above head               | 1        | Both arms | Shoulder  | Subject 6 | 0               | 0            | 0                               |
| Raise both arms to shoulder height               | 2        | Both arms | Shoulder  | Subject 6 | 0               | 0            | 0                               |
| Shoulder flexion to shoulder height (no weights) | 3        | Right     | Shoulder  | Subject 6 | 0               | 2            | 2                               |
| Shoulder flexion to shoulder height (no weights) | 3        | Left      | Shoulder  | Subject 6 | 0               | 1            | 1                               |
| Shoulder flexion to shoulder height with 500g    | 4        | Right     | Shoulder  | Subject 6 | 0               | 0            | 0                               |
| Shoulder flexion to shoulder height with 500g    | 4        | Left      | Shoulder  | Subject 6 | 0               | 0            | 0                               |
| Shoulder flexion above shoulder with 500g weight | 5        | Right     | Shoulder  | Subject 6 | 0               | 0            | 0                               |
| Shoulder flexion above shoulder with 500g weight | 5        | Left      | Shoulder  | Subject 6 | 0               | 0            | 0                               |
| Shoulder flexion above shoulder with 1 kg weight | 6        | Right     | Shoulder  | Subject 6 | 0               | 0            | 0                               |
| Shoulder flexion above shoulder with 1 kg weight | 6        | Left      | Shoulder  | Subject 6 | 0               | 0            | 0                               |
| Hand(s) to mouth                                 | 7        | Right     | Elbow     | Subject 6 | 2               | 2            | 0                               |
| Hand(s) to mouth                                 | 7        | Left      | Elbow     | Subject 6 | 2               | 2            | 0                               |
| Hands to table from lap                          | 8        | Both arms | Elbow     | Subject 6 | 2               | 2            | 0                               |
| Move weight on table 100g                        | 9        | Right     | Elbow     | Subject 6 | 2               | 2            | 0                               |
| Move weight on table 100g                        | 9        | Left      | Elbow     | Subject 6 | 2               | 2            | 0                               |
| Move weight on table 500g                        | 10       | Right     | Elbow     | Subject 6 | 2               | 2            | 0                               |
| Move weight on table 500g                        | 10       | Left      | Elbow     | Subject 6 | 2               | 2            | 0                               |
| Move weight on table 1kg                         | 11       | Right     | Elbow     | Subject 6 | 1               | 2            | 1                               |
| Move weight on table 1kg                         | 11       | Left      | Elbow     | Subject 6 | 1               | 1            | 0                               |
| Lift heavy can diagonally                        | 12       | Right     | Elbow     | Subject 6 | 1               | 2            | 1                               |
| Lift heavy can diagonally                        | 12       | Left      | Elbow     | Subject 6 | 1               | 2            | 1                               |

(repeat)

| <b>Item</b>                      | <b>Item nr.</b> | <b>Side</b> | <b>Dimension</b> | <b>Subject</b> | <b>Without support</b> | <b>With support</b> | <b>Difference with-without support</b> |
|----------------------------------|-----------------|-------------|------------------|----------------|------------------------|---------------------|----------------------------------------|
| Stack of three cans (heavy cans) | 13              | Right       | Elbow            | Subject 6      | 1                      | 2                   | 1                                      |
| Stack of three cans (heavy cans) | 13              | Left        | Elbow            | Subject 6      | 1                      | 2                   | 1                                      |
| Stack of five cans (heavy cans)  | 14              | Right       | Elbow            | Subject 6      | 0                      | 0                   | 0                                      |
| Stack of five cans (heavy cans)  | 14              | Left        | Elbow            | Subject 6      | 0                      | 0                   | 0                                      |
| Remove lid from container        | 15              | Both arms   | Elbow            | Subject 6      | 0                      | 0                   | 0                                      |
| Tearing paper                    | 16              | Both arms   | Elbow            | Subject 6      | 1                      | 1                   | 0                                      |

**Table C1: Additional activity scores per item**

| Item                       | Side      | Subject   | Without support | With support | Difference with-<br>without support |
|----------------------------|-----------|-----------|-----------------|--------------|-------------------------------------|
| Use keyboard of a computer | Both arms | Subject 1 | 1               | 2            | 1                                   |
| Eat with knife and fork    | Both arms | Subject 1 | 1               | 2            | 1                                   |
| Shake hands                | Right     | Subject 1 | 0               | 2            | 2                                   |
| Shake hands                | Left      | Subject 1 | 0               | 1            | 1                                   |
| Write                      | Both arms | Subject 1 | 2               | 2            | 0                                   |
| Turn pages of a book       | Both arms | Subject 1 | 1               | 2            | 1                                   |
| Use manual wheelchair      | Both arms | Subject 1 | 1               | 2            | 1                                   |
| Use keyboard of a computer | Both arms | Subject 2 | 2               | 2            | 0                                   |
| Eat with knife and fork    | Both arms | Subject 2 | 1               | 1            | 0                                   |
| Shake hands                | Right     | Subject 2 | 1               | 2            | 1                                   |
| Shake hands                | Left      | Subject 2 | 1               | 1            | 0                                   |
| Write                      | Both arms | Subject 2 | 2               | 2            | 0                                   |
| Turn pages of a book       | Both arms | Subject 2 | 2               | 2            | 0                                   |
| Use manual wheelchair      | Both arms | Subject 2 | 2               | 2            | 0                                   |
| Use keyboard of a computer | Both arms | Subject 3 | 1               | 2            | 1                                   |
| Eat with knife and fork    | Both arms | Subject 3 | 2               | 2            | 0                                   |
| Shake hands                | Right     | Subject 3 | 0               | 0            | 0                                   |
| Shake hands                | Left      | Subject 3 | 0               | 0            | 0                                   |
| Write                      | Both arms | Subject 3 | 2               | 2            | 0                                   |
| Turn pages of a book       | Both arms | Subject 3 | 1               | 2            | 1                                   |
| Use manual wheelchair      | Both arms | Subject 3 | n.a.            | n.a.         | n.a.                                |
| Use keyboard of a computer | Both arms | Subject 4 | 2               | 2            | 0                                   |
| Eat with knife and fork    | Both arms | Subject 4 | 1               | 2            | 1                                   |
| Shake hands                | Right     | Subject 4 | 1               | 2            | 1                                   |
| Shake hands                | Left      | Subject 4 | 0               | 2            | 2                                   |
| Write                      | Both arms | Subject 4 | 2               | 2            | 0                                   |
| Turn pages of a book       | Both arms | Subject 4 | 1               | 2            | 1                                   |
| Use manual wheelchair      | Both arms | Subject 4 | 2               | 2            | 0                                   |
| Use keyboard of a computer | Both arms | Subject 5 | 1               | 1            | 0                                   |
| Eat with knife and fork    | Both arms | Subject 5 | 1               | 0            | -1                                  |
| Shake hands                | Right     | Subject 5 | 0               | 0            | 0                                   |
| Shake hands                | Left      | Subject 5 | 0               | 0            | 0                                   |
| Write                      | Both arms | Subject 5 | 1               | 1            | 0                                   |
| Turn pages of a book       | Both arms | Subject 5 | 1               | 2            | 1                                   |
| Use manual wheelchair      | Both arms | Subject 5 | n.a.            | n.a.         | n.a.                                |
| Use keyboard of a computer | Both arms | Subject 6 | 2               | 2            | 0                                   |
| Eat with knife and fork    | Both arms | Subject 6 | 2               | 2            | 0                                   |
| Shake hands                | Right     | Subject 6 | 1               | 2            | 1                                   |
| Shake hands                | Left      | Subject 6 | 1               | 2            | 1                                   |
| Write                      | Both arms | Subject 6 | 2               | 2            | 0                                   |
| Turn pages of a book       | Both arms | Subject 6 | 2               | 2            | 0                                   |
| Use manual wheelchair      | Both arms | Subject 6 | n.a.            | n.a.         | n.a.                                |

n.a. = not applicable because subject does not use a manual wheelchair
